# Supplementary material
Source: MDPI journal article supplement (https://www.mdpi.com/2071-1050/12/17/7074)
Supplement: s1 [file s1]

Full Seed System Security Assessments – core data sets – with strong trader analysis

***Northern Katanga, Democratic Republic of Congo (2012)***

CIAT, UEA/DEV, CRS, and Caritas, 2012. Seed System Security Assessment, northern Katanga (Kalemie and Nyunzu Territories) Democratic Republic of Congo. Sept 2012. Kinshasa: Catholic Relief Services and International Center for Tropical Agriculture  
<http://seedssystem.org/wp-content/uploads/2013/07/SSSA-final-report-northern-Katanga.pdf>

***Southern Malawi 2011***

CIAT, WALA, CRS and Government of Malawi, 2011. Seed System Security Assessment, Southern Malawi. October 2011. Blantyre, Malawi: CRS and International Center for Tropical Agriculture.  
<http://seedssystem.org/wp-content/uploads/2013/07/SSSA-Southern-Malawi-Final-Report-.pdf>

***Eastern and Coastal Kenya 2011***

CIAT, CRS, Caritas, KARI, World Vision and UEA/DEV, 2011. Seed System Security Assessment, Eastern and Coastal Kenya. September 2011. Nairobi, Kenya: Catholic Relief Services and International Center for Tropical Agriculture.  
[http://seedssystem.org/wp-content/uploads/2013/07/eastern\\_coastal\\_kenya\\_final\\_report.pdf](http://seedssystem.org/wp-content/uploads/2013/07/eastern_coastal_kenya_final_report.pdf)

***South Sudan 2010***

CIAT, FAO, MAF-GoSS, AAH-I, ACTED, ADRA, AMURT, CRS, DRC, NPA, 2011. Seed System Security Assessment, Southern Sudan, November–December 2010. Funded by the European Commission Humanitarian Aid Department and the Office of Foreign Disaster Assistance, United States Agency for International Development. Juba, Southern Sudan: FAO and CIAT.  
[http://seedssystem.org/wp-content/uploads/2013/07/sssa\\_southern\\_sudan.pdf](http://seedssystem.org/wp-content/uploads/2013/07/sssa_southern_sudan.pdf)

***Zimbabwe 2009***

CIAT, CRS, World Vision, Care, AGRITEX and CIMMYT, 2009. Seed System Security Assessment, Zimbabwe. A study funded by the United States Agency for International Development. Office of Foreign Disaster Assistance. in July 2009 Rome: International Center for Tropical Agriculture.  
[http://seedssystem.org/wp-content/uploads/2013/07/zimbabwe\\_2009\\_final\\_report.pdf](http://seedssystem.org/wp-content/uploads/2013/07/zimbabwe_2009_final_report.pdf)

***Eastern Zambia 2013***

CIAT, UEA/DEV, CRS, Government of Zambia (Seed Control and Certification Institute and Ministry of Agriculture and Livestock), caritas, Profit+, and WVI, 2013. Seed Security Assessment, Eastern Zambia. A study funded by the United States Agency for International Development. Office of Foreign Disaster Assistance 2013. Lusaka. CIAT and CRS.  
<https://seedssystem.org/wp-content/uploads/2014/03/SSSA-Zambia-2013.pdf>

***Madagascar, 2013***

CRS, CARE, Caritas, CIAT, UEA/DEV and Tranoben'ny Tantsaha Nasionaly, 2013. Seed System Security Assessment, East and South Madagascar, May 2013. Antananarivo: CRA, CIAT and UEA.  
<https://seedssystem.org/wp-content/uploads/2014/03/Madagascar-SSSA-2013.pdf>

***Ethiopia, 2016***

Catholic Relief Services (CRS), Ethio-Wetlands and Natural Resources Association, Integrated Seed Sector Development (ISSD), Organization for Rehabilitation and Development in Amhara (ORDA), Relief

Society of Tigray (REST), and the Ethiopian Catholic Church - Social and Development Coordinating Offices of Meki, Hossana, and Sodo, 2016. Seed System Security Assessment in Ethiopia. Addis Ababa. <https://seedsystem.org/wp-content/uploads/2017/01/Ethiopia-SSSA-Final-Report-Dec-2016.pdf>

***Kasai Oriental, Democratic Republic of Congo (2017)***

Budikadidi/Catholic Relief Services, 2017. Seed System Security Assessment, Kasai Oriental, Democratic Republic of Congo. May 2017. Kinshasa: Catholic Relief Services. <https://seedsystem.org/wp-content/uploads/2017/09/SSSA-Kasai-20.pdf>

***Burundi, 2017***

Catholic Relief Services, 2017. Seed System Security Assessment, Muyinga, Burundi. August/September 2017. Muyinga: Catholic Relief Services. <https://seedsystem.org/wp-content/uploads/2018/01/Burundi-SSSA-Report-Final-Report.pdf>

**SSSA training courses with strong trader analysis**

***Zimbabwe, 2017***

Zimbabwe SSSA leadership course. September 18 to October 1 2017. Murewha and Mudzi. Catholic Relief Services: course public files.

***Tanzania, 2018***

Tanzania SSSA leadership course. April 15 to April 29 2018. Mbeya. Catholic Relief Services: course public files.
